# Supplementary material for: Strand-Specific RNA-Seq Analyses of Fruiting Body Development in Coprinopsis cinerea
Source: PLoS One. 2015 Oct 28;10(10):e0141586. doi: 10.1371/journal.pone.0141586 (PMC4624876; doi:10.1371/journal.pone.0141586)
Supplement: S5 Table — (XLSX) [file pone.0141586.s015.xlsx]

## Sheet: S5 Table.
S5 Table. DEGs in microarray data, inconsistent tendency with RNA-seq data.
						MA		RNA-seq
						vsn		TCC
Type of inconsistency		Oligo	ID	Description	Pfam domain	a.value	m.value	a.value	m.value	estimatedDEG
A	1	CC_OL_026_M16	CC1G_02768	phosphoglycerate mutase	Metalloenzyme superfamily	2.17189	1.0179	14.5195	-0.595585	1
Up in 6-8.	2	CC_OL_013_B14	CC1G_04430	Ras protein	Ras family	1.85403	1.41144	11.8433	-0.0335878	0
B	1	CC_OL_031_O07	CC1G_04935			1.24298	1.02058	-2.25483	-4.12786	1
Up in 8_10.	2	CC_OL_014_G24	CC1G_08184			2.44628	1.17941	1.80663	-3.28376	1
	3	CC_OL_027_I01	CC1G_13488	hypothetical protein	Phosphatidylethanolamine-binding protein	1.68398	1.33129	9.91966	-2.76923	1
	4	CC_OL_001_M03	CC1G_05954			3.18288	1.70582	9.53528	-2.3764	1
	5	CC_OL_023_E15	CC1G_12151			1.60945	1.31446	4.91404	-2.36637	1
	6	CC_OL_010_C09	CC1G_04251	transcription factor TFIIH complex subunit Rad15	DEAD_2	2.0682	1.71052	9.47439	-2.09264	1
	7	CC_OL_034_M15	CC1G_10498			1.60003	1.03588	1.20524	-2.08098	0
	8	CC_OL_030_K04	CC1G_01959	predicted protein	Inositol phospholipid synthesis protein Scs3p	1.46375	1.11467	9.89387	-1.78535	1
	9	CC_OL_006_J21	CC1G_08028			1.94531	1.01358	9.50477	-1.75446	1
	10	CC_OL_028_D01	CC1G_04195	hypothetical protein	WD domain, G-beta repeat	1.94108	1.36246	8.82085	-1.65677	1
	11	CC_OL_009_B11	CC1G_06815	hypothetical protein	RNA polymerase Rpb7-like, N-terminal domain	2.61428	1.86346	8.57438	-1.54731	1
	12	CC_OL_035_E13	CC1G_04790			1.3157	1.2744	9.28143	-1.35155	1
	13	CC_OL_030_K20	CC1G_03332	glycosyl hydrolase	Glycosyl hydrolase family 92	2.20752	1.00066	10.2653	-1.17749	1
	14	CC_OL_011_I01	CC1G_02970	translation elongation factor 2	Elongation factor Tu GTP binding domain	1.85804	1.26402	11.4672	-1.17525	1
	15	CC_OL_009_D10	CC1G_05044			2.35047	1.4337	-2.25483	-1.16085	0
	16	CC_OL_031_N08	CC1G_04511			2.19266	2.00115	12.7355	-1.09687	1
	17	CC_OL_029_D10	CC1G_15276	hypothetical protein	RNA recognition motif. (a.k.a. RRM, RBD, or RNP domain)	3.22032	1.83495	11.0099	-0.784469	1
	18	CC_OL_020_F11	CC1G_07873			2.85171	1.35139	10.8978	-0.623112	0
	19	CC_OL_015_D22	CC1G_14523			2.53216	1.05895	5.26386	-0.471294	0
	20	CC_OL_022_J09	CC1G_11801	predicted protein	F-box domain	1.56119	1.00565	4.70098	-0.309326	0
	21	CC_OL_013_A17	CC1G_02284			1.14869	1.14198	6.78574	-0.1717	0
	22	CC_OL_023_A09	CC1G_06265	predicted protein	GATA zinc finger	3.18155	1.93891	12.0139	-0.163168	0
	23	CC_OL_021_F10	CC1G_09648			2.21419	1.2517	9.32306	-0.0184187	0
C	1	CC_OL_005_O07	CC1G_02309	hypothetical protein	Domain of Unknown Function (DUF926)	2.6304	-1.02533	10.5775	0.00363539	0
Down in 8_10.	2	CC_OL_035_N06	CC1G_12279			1.86061	-1.0185	12.4772	0.0946584	0
	3	CC_OL_033_F13	CC1G_06240			2.23648	-1.05895	10.7267	0.138968	0
	4	CC_OL_012_J14	CC1G_04180	hypothetical protein	Ran binding protein in the microtubule-organising centre	0.975085	-1.01237	11.4326	0.150067	0
	5	CC_OL_015_B14	CC1G_00520	hypothetical protein	Variant SH3 domain	1.83729	-1.92086	12.0474	0.327104	0
	6	CC_OL_002_I17	CC1G_02239	ATP-binding cassette transporter	ABC transporter transmembrane region	2.53334	-1.11786	13.5329	0.333918	0
	7	CC_OL_002_G04	CC1G_04203	polyadenylate-binding protein	RNA recognition motif. (a.k.a. RRM, RBD, or RNP domain)	2.04158	-1.29135	3.68199	0.687965	0
	8	CC_OL_029_A17	CC1G_04203	polyadenylate-binding protein	RNA recognition motif. (a.k.a. RRM, RBD, or RNP domain)	2.29202	-1.20412	3.68199	0.687965	0
	9	CC_OL_031_I05	CC1G_05533			2.49251	-1.16632	10.8854	0.830673	1
	10	CC_OL_029_G02	CC1G_00699			2.15084	-1.22547	-2.25483	0.839153	0
	11	CC_OL_024_C14	CC1G_06053			3.03147	-1.13636	-2.25483	0.839153	0
	12	CC_OL_028_J06	CC1G_08016	hypothetical protein	Histone deacetylase domain	1.14125	-1.01126	-2.25483	0.839153	0
	13	CC_OL_005_O14	CC1G_08971			2.12452	-1.02176	-2.25483	0.839153	0
	14	CC_OL_009_O14	CC1G_14492			3.28252	-1.24869	-2.25483	0.839153	0
	15	CC_OL_001_D13	CC1G_02887	Cullin-4B	Cullin protein neddylation domain	2.50679	-1.03507	11.2263	0.861923	1
	16	CC_OL_032_F03	CC1G_04331	glutaminase GtaA	Protamine P1	2.96901	-1.24092	7.1741	0.935741	1
	17	CC_OL_013_B14	CC1G_04430	Ras protein	Ras family	1.77399	-1.57152	12.0702	1.03337	1
	18	CC_OL_013_H01	CC1G_07923			3.92651	-1.23095	11.5094	1.03617	1
	19	CC_OL_009_B13	CC1G_15246	ICS	Male sterility protein	2.31586	-1.01205	13.3625	1.17673	1
	20	CC_OL_035_B02	CC1G_14685			1.8623	-1.67108	11.4812	1.51269	1
	21	CC_OL_031_I24	CC1G_07195			2.46614	-1.03657	9.43013	1.65349	1
	22	CC_OL_032_N05	CC1G_12109			2.34732	-1.21523	11.0151	1.83638	1
